# Supplementary material for: Ultrasound–Vortex-Assisted Dispersive Liquid–Liquid Microextraction Combined with High Performance Liquid Chromatography–Diode Array Detection for Determining UV Filters in Cosmetics and the Human Stratum Corneum
Source: PubMed Central journal article supplement (PMC7587185; doi:10.3390/molecules25204642), 2020-10-12
Supplement: molecules-25-04642-s001.pdf [file molecules-25-04642-s001.pdf]

## Supporting Information

# Ultrasound–Vortex-Assisted Dispersive Liquid–Liquid Microextraction Combined with High Performance Liquid Chromatography–Diode Array Detection for Determining UV Filters in Cosmetics and the Human Stratum Corneum

Fang-Yi Liao <sup>1</sup>, Yu-Lin Su <sup>2</sup>, Jing-Ru Weng <sup>3</sup>, Ying-Chi Lin <sup>1,4</sup> and Chia-Hsien Feng <sup>2,4,5,6,\*</sup>

<sup>1</sup> School of Pharmacy, College of Pharmacy, Kaohsiung Medical University, Kaohsiung 80708, Taiwan; pulu9@hotmail.com (F.-Y.L.); yclin@kmu.edu.tw (Y.-C.L.)

<sup>2</sup> Department of Fragrance and Cosmetic Science, College of Pharmacy, Kaohsiung Medical University, Kaohsiung 80708, Taiwan; aitian897@gmail.com

<sup>3</sup> Department of Marine Biotechnology and Resources, National Sun Yat-sen University, Kaohsiung 80424, Taiwan; jrweng@mail.nsysu.edu.tw

<sup>4</sup> The Ph.D. Program in Toxicology, College of Pharmacy, Kaohsiung Medical University, Kaohsiung 80708, Taiwan

<sup>5</sup> Institute of Medical Science and Technology, National Sun Yat-sen University, Kaohsiung 80424, Taiwan

<sup>6</sup> Department of Medical Research, Kaohsiung Medical University Hospital, Kaohsiung 80708, Taiwan

\* Correspondence: chfeng@kmu.edu.tw; Tel.: +886-7-3121101-2805

## Table of Contents

|                   |                                                                                                                                                                                                                                                    |    |
|-------------------|----------------------------------------------------------------------------------------------------------------------------------------------------------------------------------------------------------------------------------------------------|----|
| <b>Table S1.</b>  | UV filter structures and regulations.....                                                                                                                                                                                                          | 3  |
| <b>Table S2.</b>  | Compositions of the homemade sunscreens.....                                                                                                                                                                                                       | 5  |
| <b>Table S3.</b>  | UV filter contents of cup-method samples after application of the homemade sunscreen (w/o) for 0.5, 1, 4, and 8 h.....                                                                                                                             | 6  |
| <b>Figure S1.</b> | Spectra of the UV filters. ....                                                                                                                                                                                                                    | 7  |
| <b>Figure S2.</b> | Effect of ultrasonication amplitude on the extraction efficiency of the US–VA–DLLME process. ....                                                                                                                                                  | 8  |
| <b>Figure S3.</b> | Chromatograms of mixed standard solutions without (blue) and with extraction (red) at 5 µg/mL (except OCT) and 10 µg/mL (OCT). Detection wavelengths: 300 nm (solid line); 350 nm (dash line). Peaks: ACE, 1=AV, 2=OMC, 3=OCT, 4=EHT, 5=BEMT. .... | 9  |
| <b>Figure S4.</b> | Effects of three cleaning solutions (water, 0.1% facial cleanser, and makeup remover) on the removal of the UV filters of the homemade sunscreen (o/w) on the skins of five human volunteers. ....                                                 | 10 |

Table S1. UV filter structures and regulations.

| Types | Analytes | Structure | log P | Limit Concentration (%) |          |         |
|-------|----------|-----------|-------|-------------------------|----------|---------|
|       |          |           |       | EU [1]                  | TFDA [2] | FDA [3] |
| UVA   | AV       |           | 4.8   | 5                       | 5        | 3       |
|       | BEMT     |           | 10.4  | 10                      | 10       | NA      |
| UVB   | OMC      |           | 5.3   | 10                      | 10       | 7.5     |
|       | OCT      |           | 7.1   | 10                      | 10       | 10      |

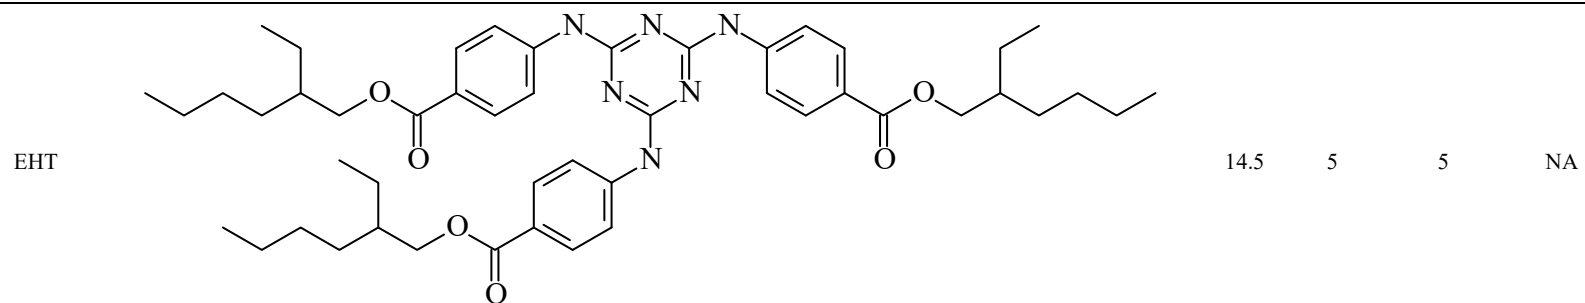

Abbreviations: Not approved (NA). The log P values of listed UV filters were referenced from <https://pubchem.ncbi.nlm.nih.gov>

**Table S2.** Compositions of the homemade sunscreens.

| Ingredients                                           | % (w/w) of ingredient |      |
|-------------------------------------------------------|-----------------------|------|
|                                                       | o/w                   | w/o  |
| <b>Oil phase</b>                                      |                       |      |
| Cetyl alcohol                                         | 0.5                   | 0.5  |
| Stearic acid                                          | 2                     | 2    |
| Mineral oil (Paraffinum Liquidum)                     | 3.5                   |      |
| Olea Europaea (olive) oil                             | 2.5                   |      |
| Avobenzone (AV)                                       | 1                     | 1    |
| Ethylhexyl methoxycinnamate (OMC)                     | 1                     | 1    |
| Octocrylene (OCT)                                     | 1                     | 1    |
| Ethylhexyl triazone (EHT)                             | 1                     | 1    |
| Bis-Ethylhexyloxyphenol Methoxyphenyl Triazine (BEMT) | 1                     | 1    |
| Beeswax                                               |                       | 0.5  |
| Cyclopentasiloxane                                    |                       | 2    |
| Glycerol monostearate                                 |                       | 2    |
| <b>Aqueous phase</b>                                  |                       |      |
| Propylene glycol                                      | 5                     |      |
| Potassium hydroxide                                   | 0.1                   |      |
| Glycerin                                              |                       | 5    |
| Sodium borate                                         |                       | 0.3  |
| Deionized water                                       | 81.4                  | 82.7 |

**Table S3.** UV filter contents of cup-method samples after application of the homemade sunscreen (w/o) for 0.5, 1, 4, and 8 h.

| UV filters | 0.5 h                           |                                 | 1 h                             |                                 | 4 h                             |                                 | 8 h                             |                                 |
|------------|---------------------------------|---------------------------------|---------------------------------|---------------------------------|---------------------------------|---------------------------------|---------------------------------|---------------------------------|
|            | Cotton                          | S.C.                            | Cotton                          | S.C.                            | Cotton                          | S.C.                            | Cotton                          | S.C.                            |
|            | Mean<br>[Range, µg]<br>(RSD, %) | Mean<br>[Range, µg]<br>(RSD, %) | Mean<br>[Range, µg]<br>(RSD, %) | Mean<br>[Range, µg]<br>(RSD, %) | Mean<br>[Range, µg]<br>(RSD, %) | Mean<br>[Range, µg]<br>(RSD, %) | Mean<br>[Range, µg]<br>(RSD, %) | Mean<br>[Range, µg]<br>(RSD, %) |
| AV         | 27.4<br>[20.1-32.2]<br>(13.9)   | 12.6<br>[5.3-16.7]<br>(31.4)    | 24.3<br>[17.3-30.3]<br>(15.1)   | 15.5<br>[9.7-25.2]<br>(29.8)    | 24.4<br>[10.3-41.4]<br>(33.3)   | 15.7<br>[9.7-37.8]<br>(51.9)    | 18.5<br>[8.6-37.4]<br>(46.0)    | 14.7<br>[6.1-32.2]<br>(57.3)    |
| OMC        | 29.6<br>[18.7-37.7]<br>(18.8)   | 16.5<br>[6.7-25.3]<br>(33.5)    | 25.7<br>[17.0-36.6]<br>(23.7)   | 20.4<br>[13.4-32.6]<br>(31.4)   | 23.4<br>[6.5-38.7]<br>(37.5)    | 17.6<br>[10.4-33.2]<br>(36.7)   | 18.0<br>[8.3-32.9]<br>(48.8)    | 16.4<br>[7.4-27.9]<br>(41.0)    |
| OCT        | 26.8<br>[20.2-29.9]<br>(12.7)   | 12.7<br>[5.4-17.2]<br>(30.8)    | 23.9<br>[17.4-29.2]<br>(13.2)   | 15.4<br>[9.8-24.6]<br>(28.7)    | 23.3<br>[10.5-33.2]<br>(26.3)   | 14.8<br>[9.8-28.6]<br>(35.9)    | 17.2<br>[8.9-29.6]<br>(38.0)    | 14.1<br>[6.0-26.1]<br>(49.6)    |
| EHT        | 7.7<br>[3.4-13.3]<br>(45.8)     | 12.3<br>[5.0-17.7]<br>(34.8)    | 6.6<br>[3.0-18.3]<br>(74.9)     | 14.7<br>[8.4-25.7]<br>(36.1)    | 7.4<br>[2.7-20.2]<br>(72.0)     | 13.4<br>[7.6-19.3]<br>(25.1)    | 5.8<br>[2.6-12.9]<br>(61.1)     | 13.4<br>[5.3-27.6]<br>(51.3)    |
| BEMT       | 7.5<br>[3.4-12.8]<br>(45.0)     | 12.4<br>[5.0-17.4]<br>(34.1)    | 6.4<br>[3.2-16.8]<br>(68.9)     | 14.5<br>[8.8-25.1]<br>(34.9)    | 7.2<br>[2.7-18.7]<br>(68.6)     | 13.4<br>[8.2-21.0]<br>(27.2)    | 5.6<br>[2.6-12.0]<br>(58.7)     | 13.3<br>[5.7-28.1]<br>(52.4)    |

Abbreviation: S.C., stratum corneum.

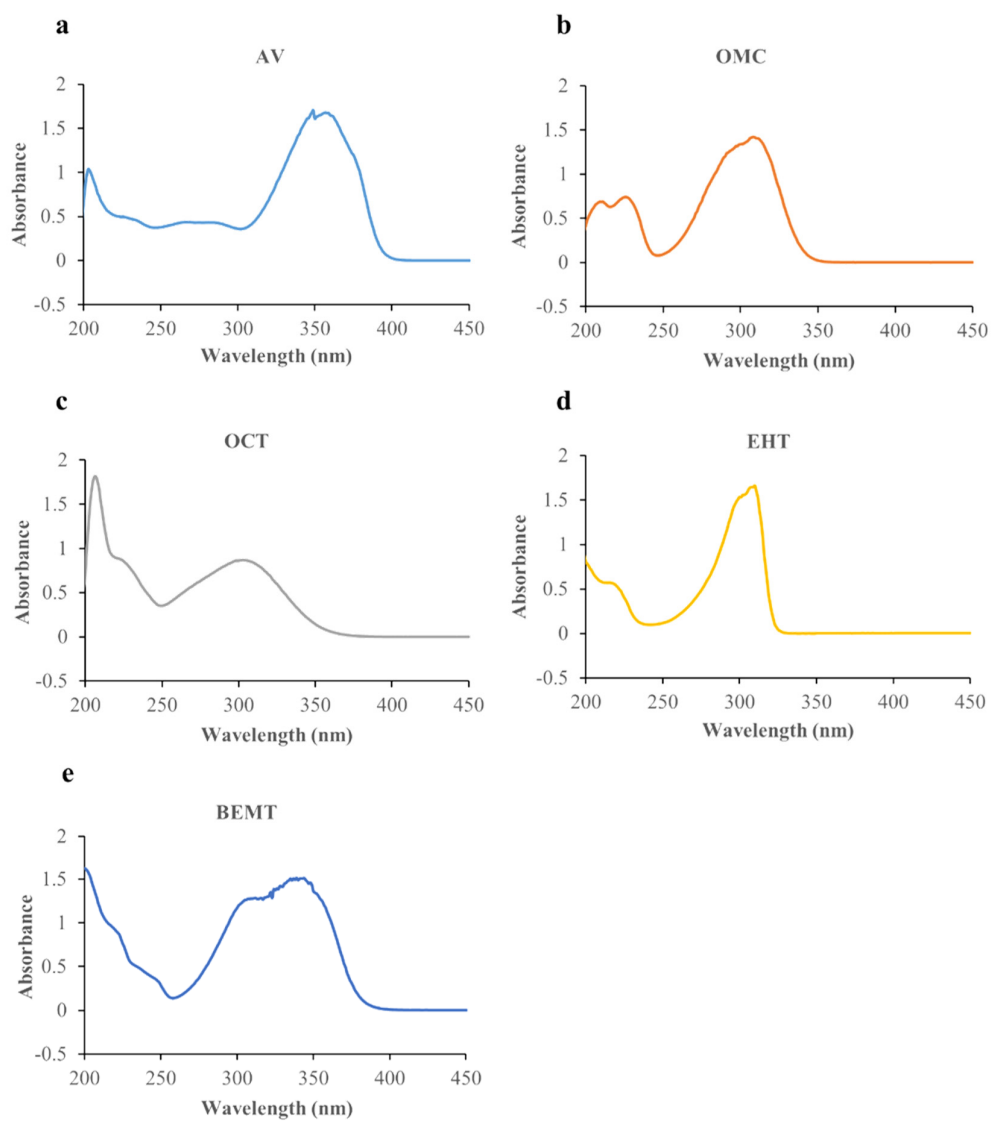

Figure S1. Spectra of the UV filters.

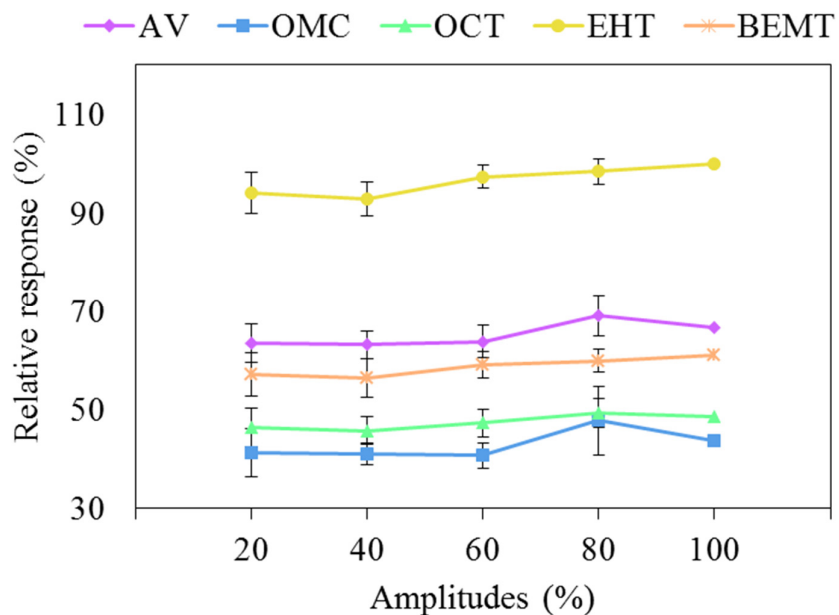

**Figure S2.** Effect of ultrasonication amplitude on the extraction efficiency of Table 3. Chromatograms of mixed standard solutions without (blue) and with extraction (red) at 5  $\mu\text{g/mL}$  (except OCT) and 10  $\mu\text{g/mL}$  (OCT). Detection wavelengths: 300 nm (solid line); 350 nm (dash line). Peaks: ACE, 1 = AV, 2 = OMC, 3 = OCT, 4 = EHT, 5 = BEMT.



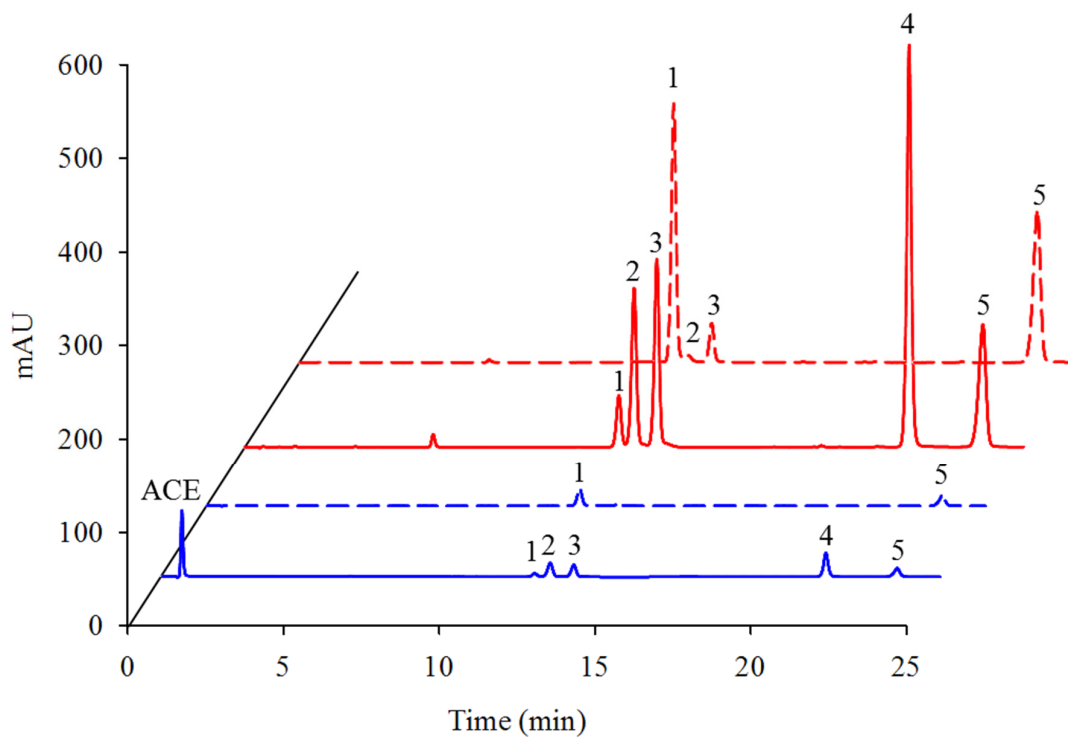

**Figure S3.** Chromatograms of mixed standard solutions without (blue) and with extraction (red) at 5  $\mu\text{g/mL}$  (except OCT) and 10  $\mu\text{g/mL}$  (OCT). Detection wavelengths: 300 nm (solid line); 350 nm (dash line). Peaks: ACE, 1=AV, 2=OMC, 3=OCT, 4=EHT, 5=BEMT.

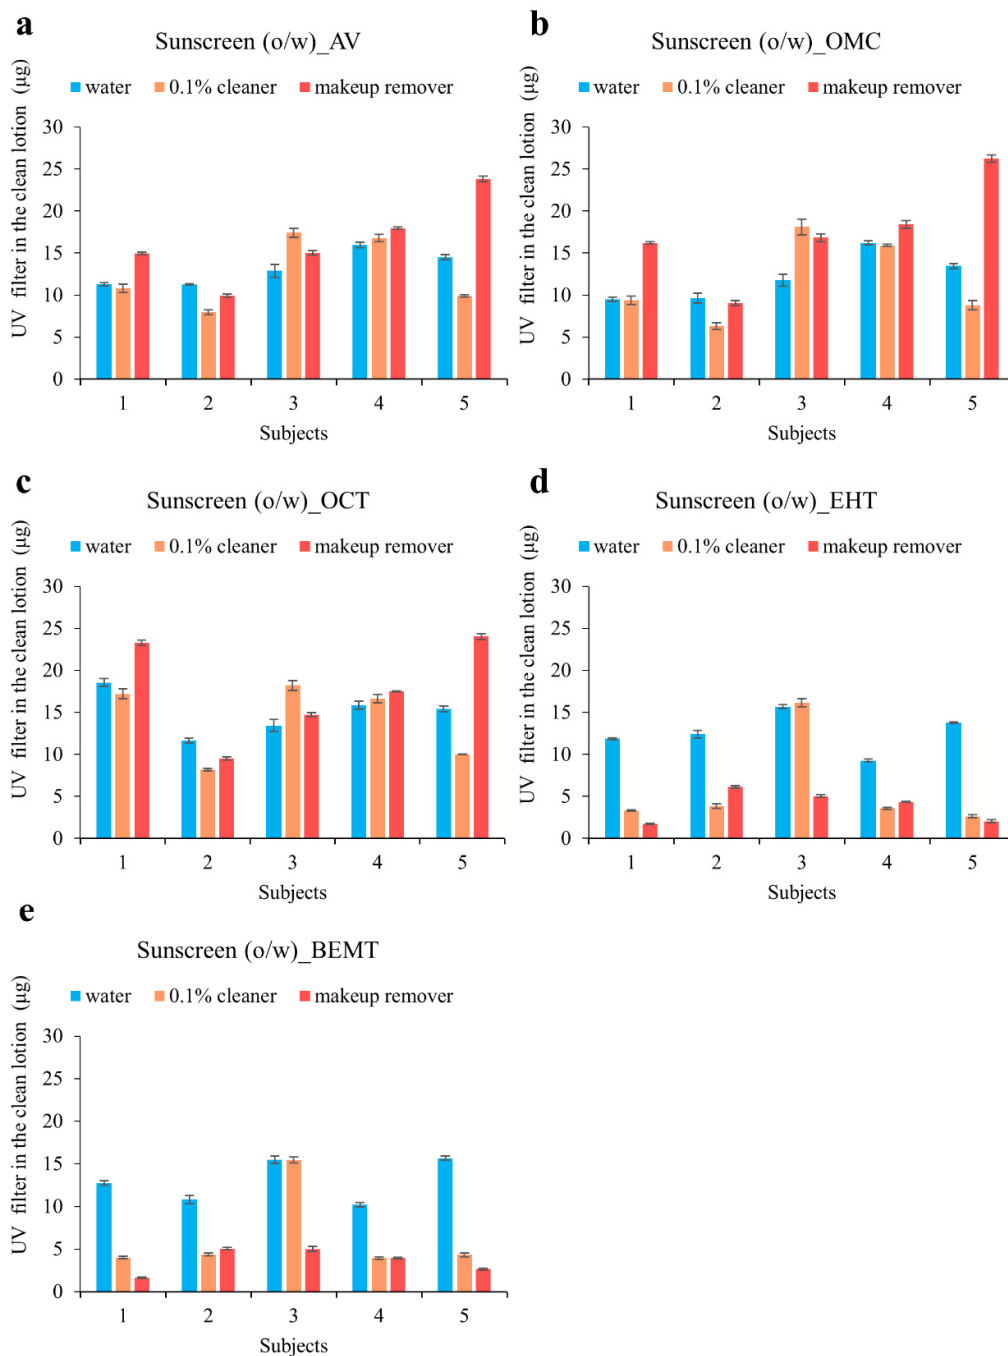

**Figure S4.** Effects of three cleaning solutions (water, 0.1% facial cleanser, and makeup remover) on the removal of the UV filters of the homemade sunscreen (o/w) on the skins of five human volunteers.
